1 **Synonymous lysine codon usage modification in a mobile antibiotic resistance gene**  
2 **similarly alters protein production in bacterial species with divergent lysine codon usage**  
3 **biases because it removes a duplicate AAA lysine codon.**

4

5 **Mohammed Alorabi<sup>1,2</sup>, Aisha M. AlAmri<sup>1,3</sup>, Yuiko Takebayashi<sup>1</sup>, Kate J. Heesom<sup>4</sup> and**  
6 **Matthew B. Avison<sup>1\*</sup>.**

7

8 **<sup>1</sup>School of Cellular & Molecular Medicine, University of Bristol. United Kingdom.**

9 **<sup>2</sup>College of Sciences, Taif University, Taif, Kingdom of Saudi Arabia.**

10 **<sup>3</sup>College of Applied Medical Sciences, Imam Abdurahman Bin Faisal University.**

11 **Dammam. Kingdom of Saudi Arabia.**

12 **<sup>4</sup>Bristol Proteomics Facility, University of Bristol. United Kingdom**

13

14 **\*Correspondence: Matthew B. Avison, School of Cellular & Molecular Medicine,**  
15 **Biomedical Sciences Building, University Walk, Bristol. BS81TD. UK. bimba@bris.ac.uk.**  
16 **+44(0)1173312063.**

17 **Abstract**

18 **The mobile antibiotic resistance gene *bla*<sub>IMP-1</sub> is clinically important and has a synonymous**  
19 **AAA:AAG lysine codon usage bias of 73:27. This bias is like that seen in experimentally**  
20 **determined highly expressed genes in *Escherichia coli* and *Acinetobacter baumannii*, but**  
21 **quite different from that seen in *Pseudomonas aeruginosa* (26:74 AAA:AAG). Here we**  
22 **show that, paradoxically, shifting the AAA:AAG lysine codon bias to 8:92 in *bla*<sub>IMP-1</sub>**  
23 **expressed from a natural promoter results in significantly more IMP-1 production in all**  
24 **three species. Sequential site directed mutagenesis revealed that increased IMP-1**  
25 **production occurs following removal of an AAA,AAA double lysine codon and that**  
26 **otherwise, lysine codon usage had no observable impact on IMP-1 production. We**  
27 **conclude that ribosomal slippage at this poly-adenosine region reduces efficient**  
28 **translation of IMP-1 and that punctuating the region with guanine reduces ribosomal**  
29 **slippage and increases IMP-1 production.**

30

31

## 32 **Introduction**

33 Synonymous codon usage bias (SCUB) is a term describing the common finding that  
34 organisms favour the use of certain triplet codons in DNA to encode certain amino acids.  
35 Since SCUB varies between organisms, and between different genes in a single organism,  
36 the implication is that optimal SCUB varies between different organisms, and that certain  
37 genes are selected to be closer to the optimal SCUB than others (1). One dominant  
38 hypothesis is that highly expressed genes have “optimised” SCUB and that this is selected  
39 because optimal codons are translated more quickly and/or more efficiently than sub-  
40 optimal ones. This is particularly important when the demand for a protein is high (1).  
41 Indeed, it is well known that SCUB optimization – adapting the SCUB of a recombinant gene  
42 to match that of highly expressed genes – increases recombinant protein production in a  
43 heterologous host (2). The success of this methodological approach has been used to  
44 advance the translationally-selective hypothesis to explain SCUB. However, most codon  
45 usage optimization procedures involve the over-expression of recombinant genes using  
46 hyper-strong, inducible promoters and high copy number vectors, with a desire to make a  
47 single protein represent a high percentage of total protein in the cell (3). This is not likely to  
48 reflect the situation encountered by a gene in a natural setting with a natural promoter on  
49 the chromosome or a low copy number plasmid.

50 SCUB is particularly relevant in the context of horizontal gene transfer. Whilst sub-optimal  
51 SCUB is not always seen in horizontally acquired genes, depending on their origins, for those  
52 that are sub-optimal, selective pressure is expected to be applied over time to optimise  
53 SCUB; a process referred to as “codon usage amelioration” (4). Antibiotic resistance in  
54 bacteria is one of the most pressing threats to human health and horizontal gene transfer is

55 one of the most important means for a bacterium to acquire antibiotic resistance (5). It is  
56 evident that many mobile genetic elements are of low guanine plus cytosine (GC) content  
57 and carry a related SCUB biased towards low GC codons (6). So, in this context, the impact  
58 of SCUB on gene expression is not only academic, but it is also of significant practical  
59 interest. The aim of the work reported in this paper was to test the hypothesis that SCUB  
60 change can affect the absolute amount of active protein produced in a predictable manner  
61 using a natural plasmid system and an intermediate strength natural promoter using a  
62 clinically important, mobile antibiotic resistance gene.

63

## 64 **Results and Discussion**

65 The *bla*<sub>IMP-1</sub> metallo- $\beta$ -lactamase-encoding gene cassette, which confers resistance to the  
66 carbapenems, a class of “last resort” antibiotics, has a GC content of 39% (7). However, it  
67 has been found widely among Gram-negative bacteria with varying genomic GC contents  
68 (8). For example, it is commonly found in *Escherichia coli* and other Enterobacteriaceae  
69 which have genomic GCs of  $\approx$ 50%. Accordingly, if SCUB affects translational efficiency  
70 and/or rate, one would expect the amount of IMP-1 enzyme should be seen to increase in  
71 Enterobacteriaceae if the SCUB of *bla*<sub>IMP-1</sub> is ameliorated to match the optimal SCUB of this  
72 family, as represented by *E. coli*. To test this, specific imipenemase activity was measured in  
73 extracts of *E. coli* MG1655 transformants carrying pHIMP or pHEcIMP, being the cloned  
74 wild-type or *E. coli* SCUB optimised *bla*<sub>IMP-1</sub> gene cassette, respectively, each under the  
75 control of an identical, natural, intermediate-strength integron promoter, and each ligated  
76 into a broad host-range, low copy number vector derived from a natural antibiotic  
77 resistance plasmid: RK2 (9). We can confirm that pHIMP is a truly natural expression system

78 because imipenemase activity in an MG1655 transformant carrying pNIMP (the natural  
79 *bla*<sub>IMP-1</sub> encoding plasmid) and MG1655(pHIMP) were the same (**Figure 1**). If the hypothesis  
80 being tested is correct, it was expected that optimisation of *bla*<sub>IMP-1</sub> to a SCUB closer to  
81 optimal in *E. coli* genes would increase IMP-1 production relative to wild-type. However, this  
82 was not observed. The pHEclIMP variant synthesised to match the “optimal” SCUB of *E. coli*  
83 presumed highly expressed genes (ribosomal protein and translation elongation factor  
84 genes) based on the OPTIMIZER algorithm (10) was expressed at lower levels than than the  
85 wild-type gene ( $p < 0.0001$ ) (**Figure 1**).

86 It was considered possible that the effect seen here is due to stability changes at the 5' end  
87 of the codon-optimised *bla*<sub>IMP-1</sub> mRNA. Strong regions of secondary structure at the 5' ends  
88 of mRNA molecules are likely to cause ribosomal occlusion leading to the exposure of mRNA  
89 to nuclease digestion (11). Furthermore, it has previously been shown that synonymous  
90 mutations that increase mRNA secondary structure (high folding energy) at the beginning of  
91 the transcript can reduce protein production by inhibiting the initiation and initial phase of  
92 translation elongation (12-14). It was confirmed that codon optimization increased the  
93 energy required to unfold the mRNA. The Gibbs free energy value of the whole mRNA  
94 molecule was -183 (wild type *bla*<sub>IMP-1</sub>) changing to -229 for the *E. coli* codon optimised  
95 variant. Just looking at the 5' third of the mRNA, which is thought to be particularly  
96 important, the folding energy calculated showed the same effect: moving from -50 for wild-  
97 type *bla*<sub>IMP-1</sub> to -67 for the *E. coli* variant.

98 **Figure 1** shows evidence, therefore, that codon optimization can have negative effects on  
99 gene expression in a natural expression system, but it was considered of interest to see how  
100 much of a change in IMP-1 production would occur upon site-directed mutation of

101 individual codons. Twenty six of 246 (10.6%) of IMP-1's amino acids are lysine. The lysine  
102 codon AAA is in the majority in *bla*<sub>IMP-1</sub> (19/26; 73%) and AAG accounts for the rest. Rather  
103 than relying on theoretical lists of "highly expressed genes" to define the "optimal" SCUB for  
104 lysine codons in *bla*<sub>IMP-1</sub>, we measured protein abundance using LC-MS/MS proteomics. In so  
105 doing we defined the 20 most highly abundant proteins in three test species during growth  
106 under the conditions we would also use to test IMP-1 production (**Tables 1-3**). Analysis of  
107 lysine SCUB in the genes encoding these 20 proteins from each species revealed an AAA  
108 percentage of 84% for *Acinetobacter baumannii*, 80% for *E. coli* and 24% for *Pseudomonas*  
109 *aeruginosa* (**Tables 4-6**). We sub-cloned the wild-type *bla*<sub>IMP-1</sub> gene from pHIMP into the  
110 pSU18 cloning vector and used site directed mutagenesis to dramatically reduced the AAA  
111 lysine codon usage of *bla*<sub>IMP-1</sub> in the resultant pSUHIMP-WT plasmid to 2/26 or 8% AAA in  
112 plasmid pSUHIMP-KV. Plasmids were used to transform an *E. coli* clinical isolate to  
113 chloramphenicol resistance. The wild-type and lysine codon-variant *bla*<sub>IMP-1</sub> genes were also  
114 sub-cloned into the broad host-range vector pUBYT, generating pUBYTHIMP-WT and  
115 pUBYTHIMP-KV, which were used to transform *P. aeruginosa* PA01 or *A. baumannii* CIP 70-  
116 10 to kanamycin resistance. We then used proteomics to measure the abundance of IMP-1  
117 in these transformants, which was normalised using the abundance of vector-encoded Cat  
118 (in *E. coli* pSUHIMP-WT and -KV transformants) or AphA (in *A. baumannii* and *P. aeruginosa*  
119 pUBYTHIMP-WT and -KV transformants) to take into consideration plasmid copy number  
120 and protein loading. Our expectation given the hypothesis that SCUB is selected based on  
121 translation rate or efficiency was that as AAA usage was reduced to 2/26 from a wild-type  
122 position of 19/26, which is close to optimal in *A. baumannii* (22/26) and *E. coli* (21/26) there  
123 would be a reduction in IMP-1 production. The case in *P. aeruginosa* was not so clear, given  
124 that the optimal AAA usage in this species is 6/26. Here, the variant is closer to optimal than

125 the wild-type gene, so we might expect an increase in IMP-1 production. We did see this: a  
126 1.5-fold increased normalised IMP-1 production in PA01(pUBYTHIMP-KV) compared with  
127 PA01(pUBYTHIMP-WT),  $p=0.04$  for an unpaired t-test,  $n=3$ . However, the variant also  
128 supported higher IMP-1 protein production in *E. coli* (2.2-fold,  $p=0.005$   $n=3$ ) and *A.*  
129 *baumannii* (3.2-fold,  $p=0.002$ ,  $n=3$ ) (**Figure 2**).

130 These data show that the simple idea of optimization based on average SCUB – even when  
131 that average is taken from highly expressed genes confirmed by proteomics – is rather  
132 naïve. The codons in an mRNA affect its folding, which affects its stability and the rate of  
133 translation initiation and elongation; local and global charged tRNA levels affect translation  
134 elongation rate, and this must be optimised and even varied during the translation of an  
135 mRNA to allow accurate protein folding (11-14). Our finding of increased IMP-1 production  
136 when AAG lysine codons dominate is not due to relative tRNA abundance since there is only  
137 one lysine-tRNA, which recognises both AAA and AAG codons (15). Lysine tRNA/codon  
138 specific nucleases have been reported in *E. coli* (16), and it is conceivable that AAA/tRNA  
139 interactions preferably promote mRNA cleavage, but the effect we report was seen in three  
140 very distinct species, and there is no evidence that AAG/anticodon interactions mean less  
141 cleavage, even in *E. coli* (16). The most likely explanation for our findings is a report that  
142 duplicate AAA lysine codons lead to ribosomal sliding and increased aberrant translation of  
143 an mRNA in *E. coli* (17). We analysed the concatenated sequence data for the genes  
144 encoding the 20 most abundant proteins in *E. coli* and found that there are eleven AAA,AAA  
145 double lysine codons, comprising 7.8% of all AAA codons. In contrast there are eleven  
146 AAA,AAG or AAG,AAA and two AAG,AAG double lysine codons and one AAG,AAG,AAG triple  
147 lysine codon found amongst these 20 genes, comprising 26.1% of all AAG codons. This

148 suggests that there is selective pressure for the inclusion of AAG codons preferentially  
149 where two or more lysines are encoded together. Within the 17 AAA to AAG mutations  
150 made in our lysine codon modified *bla*<sub>IMP-1</sub> gene (**Figure 3**) one is part of an AAA,AAA double  
151 lysine codon, with both codons being converted into AAG in the same mutagenesis step  
152 (mutations 6 and 7). To test the specific effects of this mutagenesis step, we measured  
153 imipenemase activity in cell extracts of *E. coli* MG1655 transformants carrying pSUHIMP  
154 variants having an accumulating number of AAA to AAG mutations, from 1 to 17, starting at  
155 the 5' end of the gene. **Figure 4** shows that carrying *bla*<sub>IMP-1</sub> with 6 or more mutations gives  
156 levels of IMP-1 enzyme activity not significantly different from that provided by pSUHIMP-  
157 KV, having all 17 mutations ( $p>0.1$ ). Importantly, introduction of mutations 6 and 7, where  
158 IMP-1 enzyme activity significantly increases from basal ( $p<0.03$ ) is the point at which the  
159 AAA,AAA double lysine codon is converted to AAG,AAG. Therefore, based on previously  
160 published work using in vitro translation experiments (17), we conclude that there is  
161 ribosomal slippage at the AAA,AAA run located in the *bla*<sub>IMP-1</sub> mRNA, reducing the amount  
162 of active IMP-1 protein produced. Breaking up this run with AAG codons means more  
163 correct translation and so more IMP-1 enzyme activity. Importantly, we see this effect in all  
164 three species tested, despite their divergence. There is no evidence for mutation in the  
165 AAA,AAA run in any *bla*<sub>IMP-1</sub> variant sequence in the Genbank nucleotide sequence database,  
166 according to blastn, so the increased IMP-1 enzyme production stimulated by this mutation  
167 is seemingly not under strong selective pressure *in vivo*. However, there are two IMP  
168 variants where the second lysine codon in this run has been mutated in a non-synonymous  
169 way. The most common of these is IMP-22 (18).



170 In conclusion, codon “optimisation” and mutations that change SCUB to be more closely  
171 aligned or more distantly aligned to highly expressed genes in multiple bacteria do not  
172 guarantee higher levels of gene expression. Indeed, for synonymous lysine codon changes,  
173 the increase in IMP  $\beta$ -lactamase production when SCUB was moved further from “optimal”  
174 is paradoxical and is most likely to be caused by reduced aberrant protein production that  
175 occurs when AAA codons are present in duplicate (17). Care should therefore be taken when  
176 interpreting the potential impact of synonymous mutations that affect codon usage in  
177 horizontally acquired genes carried on natural plasmids and expressed from native  
178 promoters without experimental determination of the effect of these mutations on protein  
179 abundance or some phenotypic proxy thereof.

180

## 181 **Experimental**

### 182 Bacterial Strains

183 Bacterial strains used in the study were *E. coli* TOP10 (Invitrogen), MG1655 (19) and a clinical  
184 isolate from urine (a gift from Dr Mandy Wooton, Public Health Laboratory for Wales); *P.*  
185 *aeruginosa* PA01 (20) and *A. baumannii* CIP 70-10 (21)

### 186 Molecular Biology

187 The *bla*<sub>IMP-1</sub> gene was amplified using PCR. Template DNA was extracted from *P. aeruginosa*  
188 clinical isolate 206-3105A (a gift from Dr Mark Toleman, Department of Medical  
189 Microbiology, Cardiff University) by suspending a loop-full of bacteria from a fresh Nutrient  
190 Agar plate (Oxoid) in 100  $\mu$ l of molecular biology grade water. The tube was then incubated  
191 at 95°C for 15 min and centrifuged at 13,000 rpm for 10 min. The supernatant was removed  
192 as a source of template DNA. The integron promoter type upstream of *bla*<sub>IMP-1</sub> in isolate

193 206-3105A is Pch1 (22), and there is a *bla*<sub>OXA-2</sub> gene cassette downstream from *bla*<sub>IMP-1</sub>  
194 (Genbank accession: AP012280.1). PCR used forward primers which were designed to  
195 amplify from the 5' end of the wild-type Pch1 promoter (5'-  
196 ACCCAGTGGACATAAGCCTGTTCGGTTCGTAAACT-3') into the 5' end of the *bla*<sub>OXA-2</sub> gene  
197 cassette, (5'-AGCGAAGTTGATATGTATTGTG-3'). Each PCR reaction mixture contained 20 ng  
198 of template DNA, 0.4 μmol of each primer, 12.5 μl of RedTaq PCR-ready reaction mix  
199 (Sigma-Aldrich) and 8.5 μl of molecular biology grade water. PCR reactions were processed  
200 in PTC-100 thermal cycler (Bio-Rad, UK) in 0.2 ml PCR tubes (Starlabs). PCR reaction cycles  
201 were 10 min at 95°C, followed by 35 cycles of, 1 min denaturation at 95°C, 1 min annealing  
202 at 58°C and 2 min extension at 72°C. The final step was an extension at 72°C for 10 min. The  
203 PCR amplicon was TA cloned into the pCR2.1TOPO cloning vector (Invitrogen), removed with  
204 EcoRI and ligated into EcoRI linearised RK2-derived vector pRW50 (9) to create the  
205 recombinant plasmid pHIMP or the broad host range p15A derived vector pSU18 (23) to  
206 create the recombinant plasmid pSUHIMP.

207 The *E. coli* codon optimized *bla*<sub>IMP-1</sub> gene variant was designed using the program  
208 OPTIMIZER (10) and the variant, including up- and down-stream sequences identical to  
209 those seen in pHIMP was synthesized by GeneArt (Thermo-Fisher) and provided, cloned into  
210 the cloning vector pMK as the vector pMKHEcIMP. The optimised gene was amplified by PCR  
211 using pMKHEcIMP as template and cloned into pRW50, as described for the wild-type gene  
212 to create the recombinant plasmid pHEcIMP.

213 Site directed mutagenesis was performed using the QuikChange® Lightning Site-Directed  
214 Mutagenesis Kit (Agilent, UK) according to the manufacturer's instructions and pSUHIMP as  
215 the template. The 17 individual AAA to AAG mutations (**Figure 3**) were introduced in 14

216 separate mutagenesis steps, each creating a variant with an increasing number of mutations  
217 starting at the 5' end of the gene. The primers were designed using the mutagenesis kit  
218 manufacturer's instructions and are shown in **Table 7**.

219 For transformation of *A. baumannii* and *P. aeruginosa bla<sub>IMP-1</sub>* wild type and variants were  
220 subcloned into vector pUBYT being the plasmid pYMAb2 (24) which we modified to remove  
221 the OXA promotor region (located upstream of the multiple cloning site) by PCR  
222 amplification using primers, 5'-GCAAGAAGGTGATGAATCTACA-3' and 5'-  
223 GTGGCAGCAGCCAACTCA-3' followed by digestion with XbaI and ligation to produce a  
224 circular product.

#### 225 Measuring imipenemase specific activity in cell extracts

226 A volume of 0.5 ml of overnight nutrient bacterial broth culture was added to a 10 ml of  
227 fresh nutrient broth which was incubated at 37°C with shaking until an OD<sub>600</sub> of 0.5-0.6 was  
228 reached. The cells were then pelleted by centrifugation at 4,500 rpm for 10 min at 4°C. The  
229 pellet was re-suspended in 1 ml of 50 mM HEPES (containing 100 µM ZnCl<sub>2</sub> at pH 7) and  
230 transferred to a tube of lysing matrix B (Fisher Scientific, UK). The cells were lysed using a  
231 Ribolyser (Hybaid, UK) at speed of 6.0 for 40 s followed by centrifugation at 13,000 rpm for  
232 1 min to pellet cell debris. The supernatant was used for enzyme activity measurement.  
233 Total protein concentration was determined using the Bio-Rad protein assay reagent  
234 according to the manufacturer's instructions. To measure the imipenemase activity in an  
235 extract, 100 µl of extract was added to 900 µl of HEPES buffer (containing ZnCl<sub>2</sub>, as above)  
236 and 0.1 mM imipenem. Change of absorbance was monitored at 299 nm over 10 min.  
237 Specific enzyme activity (pmol imipenem hydrolysed per mg of protein per sec) in each

238 extract was calculated using  $7000 \text{ M}^{-1}$  as the extinction coefficient of imipenem and dividing  
239 enzyme activity with the total amount of protein in each assay.

#### 240 mRNA Secondary Structure Prediction

241 To assess the presence of significant secondary structure in the transcript of wild-type  
242 *bla*<sub>IMP-1</sub> and the *E. coli* SCUB optimized variant, the Mfold program  
243 (<http://unafold.rna.albany.edu/?q=mfold>) was used to predict the folding of the mRNA  
244 sequences.

#### 245 Preparation of samples from cultured bacteria and proteomics analysis

246 Bacterial cultures were incubated 50 ml Nutrient Broth (Sigma) with shaking (160 rpm) at  
247 37°C until OD<sub>600</sub> reached 0.6-0.8. Cells in cultures were pelleted by centrifugation (10 min,  
248 4,000 × g, 4°C) and resuspended in 35 mL of 30 mM Tris-HCl, pH 8 and broken by sonication  
249 using a cycle of 1 sec on, 1 sec off for 3 min at amplitude of 63% using a Sonics Vibracell VC-  
250 505TM (Sonics and Materials Inc., Newton, Connecticut, USA). The sonicated samples were  
251 centrifuged at 8,000 rpm (Sorvall RC5B PLUS using an SS-34 rotor) for 15 min at 4°C to pellet  
252 intact cells and large cell debris and protein concentration in the supernatant was  
253 determined using the Bio-Rad Protein Assay Reagent according to the manufacturer's  
254 instructions. One microgram of total protein was separated by SDS-PAGE using 11%  
255 acrylamide, 0.5% bis-acrylamide (Bio-Rad) gels and a Bio-Rad Mini-Protein TetraCell  
256 chamber model 3000X1. Gels were run at 150 V until the dye front had moved  
257 approximately 1 cm into the separating gel. Proteins in gels were stained with Instant Blue  
258 (Expedeon) for 5 min and de-stained in water. The 1 cm of gel lane containing each sample  
259 was cut out and proteins subjected to in-gel tryptic digestion using a DigestPro automated

260 digestion unit (Intavis Ltd). The resulting peptides were fractionated using an Ultimate 3000  
261 nanoHPLC system in line with an LTQ-Orbitrap Velos mass spectrometer (Thermo Scientific)  
262 as previously described (25). The raw data files were processed and quantified using  
263 Proteome Discoverer software v1.4 (ThermoScientific) and searched against the UniProt *P.*  
264 *aeruginosa* PA01 database (5563 proteins; UniProt accession UP000002438), the *A.*  
265 *baumannii* ATCC 17978 database (3783 proteins; UniProt accession UP0006737) or the *E.*  
266 *coli* MG1655 database (4307 proteins; UniProt accession UP000000625). The database file is  
267 provided as supplementary data. Proteomic searches against the databases was were  
268 performed using the SEQUEST (Ver. 28 Rev. 13) algorithm. Protein Area measurements were  
269 calculated from peptide peak areas using the “Top 3” method (26) and were then used to  
270 calculate the relative abundance of each protein. Proteins with fewer than three peptide  
271 hits were excluded from the analysis.

## 272 Codon Usage Calculation

273 The open reading frames of the 20 most highly expressed genes in each species were  
274 downloaded from Genbank and concatenated into a single reading frame. The codon usage  
275 calculator (<https://www.biologicscorp.com/tools/CodonUsageCalculator#.WrZ02IjFI2w>) was  
276 applied to this concatenated open reading frame using the standard genetic code table.

277

## 278 **Funding**

279 This work was funded by grant MR/N013646/1 to M.B.A. and K.J.H. from the Antimicrobial  
280 Resistance Cross Council Initiative supported by the seven United Kingdom research councils.

281 A

282 Additional support came from a grant to M.B.A. from the British Society for Antimicrobial  
283 Chemotherapy. M.A. and A.M.A were both supported by Postgraduate Scholarships from the  
284 Cultural Bureau of the Kingdom of Saudi Arabia.

285

## 286 **Transparency Declaration**

287 None to declare – All authors.

288

## 289 **References**

- 290 1. Supek F. The Code of Silence: Widespread Associations Between Synonymous Codon  
291 Biases and Gene Function. *J Mol Evol.* 2016;82:65-73.
- 292 2. Burgess-Brown NA, Sharma S, Sobott F, Loenarz C, Oppermann U, Gileadi O. Codon  
293 optimization can improve expression of human genes in *Escherichia coli*: A multi-  
294 gene study. *Protein Expr Purif.* 2008;59:94-102.
- 295 3. Hannig G, Makrides SC. Strategies for optimizing heterologous protein expression in  
296 *Escherichia coli*. *Trends Biotechnol.* 1998;16:54-60.
- 297 4. Medrano-Soto A, Moreno-Hagelsieb G, Vinuesa P, Christen JA, Collado-Vides J.  
298 Successful lateral transfer requires codon usage compatibility between foreign genes  
299 and recipient genomes. *Mol Biol Evol.* 2004;21:1884-94.
- 300 5. von Wintersdorff CJ, Penders J, van Niekerk JM, Mills ND, Majumder S, van Alphen  
301 LB, Savelkoul PH, Wolfs PF. Dissemination of Antimicrobial Resistance in Microbial  
302 Ecosystems through Horizontal Gene Transfer. *Front Microbiol.* 2016;7:173.
- 303 6. Rocha EP, Danchin A. Base composition bias might result from competition for  
304 metabolic resources. *Trends Genet.* 2002;18:291-4.

- 305 7. Osano E, Arakawa Y, Wacharotayankun R, Ohta M, Horii T, Ito H, Yoshimura F, Kato  
306 N. Molecular characterization of an enterobacterial metallo beta-lactamase found in  
307 a clinical isolate of *Serratia marcescens* that shows imipenem resistance. Antimicrob  
308 Agents Chemother. 1994;38:71-8.
- 309 8. Walsh TR. Clinically significant carbapenemases: an update. Curr Opin Infect Dis.  
310 2008;21:367-71.
- 311 9. Lodge J, Fear J, Busby S, Gunasekaran P, Kamini NR. Broad host range plasmids  
312 carrying the *Escherichia coli* lactose and galactose operons. FEMS Microbiol Lett.  
313 1992;74:271-6.
- 314 10. Puigbò P, Guzmán E, Romeu A, Garcia-Vallvé S. OPTIMIZER: a web server for  
315 optimizing the codon usage of DNA sequences. Nucleic Acids Res. 2007;35:W126-31.
- 316 11. Iost I, Dreyfus M. The stability of *Escherichia coli lacZ* mRNA depends upon the  
317 simultaneity of its synthesis and translation. EMBO J. 1995;14:3252-61.
- 318 12. Jacques N, Dreyfus M. Translation initiation in *Escherichia coli*: old and new  
319 questions. Mol Microbiol. 1990;4:1063-7.
- 320 13. Mohsen AW, Vockley J. High-level expression of an altered cDNA encoding human  
321 isovaleryl-CoA dehydrogenase in *Escherichia coli*. Gene. 1995;160:263-7.
- 322 14. Nilsson LO, Mannervik B. Improved heterologous expression of human glutathione  
323 transferase A4-4 by random silent mutagenesis of codons in the 5' region. Biochim  
324 Biophys Acta. 2001;1528:101-6.
- 325 15. Kramer EB, Farabaugh PJ. The frequency of translational misreading errors in *E. coli*  
326 is largely determined by tRNA competition. RNA. 2007;13:87-96.

- 327 16. Meidler R, Morad I, Amitsur M, Inokuchi H, Kaufmann G. Detection of anticodon  
328 nuclease residues involved in tRNA<sup>Lys</sup> cleavage specificity. *J Mol Biol.* 1999;287:499-  
329 510.
- 330 17. Koutmou KS, Schuller AP, Brunelle JL, Radhakrishnan A, Djuranovic S, Green R.  
331 Ribosomes slide on lysine-encoding homopolymeric A stretches. *Elife.* 2015;4. doi:  
332 10.7554/eLife.05534.
- 333 18. Pellegrini C, Mercuri PS, Celenza G, Galleni M, Segatore B, Sacchetti E, Volpe R,  
334 Amicosante G, Perilli M. Identification of *bla*(IMP-22) in *Pseudomonas* spp. in urban  
335 wastewater and nosocomial environments: biochemical characterization of a new  
336 IMP metallo-enzyme variant and its genetic location. *J Antimicrob Chemother.*  
337 2009;63:901-8.
- 338 19. Guyer MS, Reed RR, Steitz JA, Low KB. Identification of a sex-factor-affinity site in *E.*  
339 *coli* as gamma delta. *Cold Spring Harb Symp Quant Biol.* 1981;45:135-40.
- 340 20. Holloway BW. Genetic recombination in *Pseudomonas aeruginosa*. *J Gen Microbiol.*  
341 1955;13:572-81.
- 342 21. Bouvet PJM, Grimont PAD. Taxonomy of the genus *Acinetobacter* with the  
343 recognition of *Acinetobacter baumannii* sp. nov., *Acinetobacter haemolyticus* sp.  
344 nov., *Acinetobacter johnsonii* sp. nov. and *Acinetobacter junii* sp. nov. and emended  
345 descriptions of *Acinetobacter calcoaceticus* and *Acinetobacter lwoffii*. *Int J Syst*  
346 *Bacteriol* 1986;36:228–240.
- 347 22. Jové T, Da Re S, Denis F, Mazel D, Ploy MC. Inverse correlation between promoter  
348 strength and excision activity in class 1 integrons. *PLoS Genet.* 2010;6:e1000793.



- 349 23. Bartolomé B, Jubete Y, Martínez E, de la Cruz F. Construction and properties of a  
350 family of pACYC184-derived cloning vectors compatible with pBR322 and its  
351 derivatives. *Gene*. 1991;102:75-8.
- 352 24. Kuo SC, Yang SP, Lee YT, Chuang HC, Chen CP, Chang CL, Chen TL, Lu PL, Hsueh PR,  
353 Fung CP. Dissemination of imipenem-resistant *Acinetobacter baumannii* with new  
354 plasmid-borne *bla*OXA-72 in Taiwan. *BMC Infect Dis*. 2013;13:319
- 355 25. Jiménez-Castellanos JC, Wan Nur Ismah WAK, Takebayashi Y, Findlay J, Schneiders T,  
356 Heesom KJ, Avison MB. Envelope proteome changes driven by RamA overproduction  
357 in *Klebsiella pneumoniae* that enhance acquired  $\beta$ -lactam resistance. *J Antimicrob*  
358 *Chemother*. 2018;73:88-94.
- 359 26. Silva JC, Gorenstein M V, Li G-Z, Vissers JPC, Geromanos SJ. Absolute quantification  
360 of proteins by LCMSE: a virtue of parallel MS acquisition. *Mol Cell Proteomics*.  
361 2006;5:144-156.

362 **Tables**

363 **Table 1:** The 20 most highly abundant proteins in *E. coli* during growth in Nutrient Broth

| Accession | Description                                | Gene Name | Mean Abundance (n=3) |
|-----------|--------------------------------------------|-----------|----------------------|
| P0CE48    | Elongation factor Tu                       | b3980     | 6.184E+08            |
| P0A9B2    | Glyceraldehyde-3-phosphate dehydrogenase A | b1779     | 3.399E+08            |
| P69776    | Major outer membrane lipoprotein Lpp       | b1677     | 2.654E+08            |
| P0A7J3    | 50S ribosomal protein L10                  | b3985     | 2.539E+08            |
| P06996    | Outer membrane protein C                   | b2215     | 2.425E+08            |
| P02359    | 30S ribosomal protein S7                   | b3341     | 2.357E+08            |
| P0A7R1    | 50S ribosomal protein L9                   | b4203     | 2.253E+08            |
| P0A7L0    | 50S ribosomal protein L1                   | b3984     | 2.219E+08            |
| P60438    | 50S ribosomal protein L3                   | b3320     | 2.022E+08            |
| P0AG55    | 50S ribosomal protein L6                   | b3305     | 1.825E+08            |
| P0A910    | Outer membrane protein A                   | b0957     | 1.780E+08            |
| P0A7W1    | 30S ribosomal protein S5                   | b3303     | 1.752E+08            |
| P62399    | 50S ribosomal protein L5                   | b3308     | 1.743E+08            |
| P0A6M8    | Elongation factor G                        | b3340     | 1.644E+08            |
| P0A7V8    | 30S ribosomal protein S4                   | b3296     | 1.642E+08            |
| P0A7R5    | 30S ribosomal protein S10                  | b3321     | 1.622E+08            |
| P0AG67    | 30S ribosomal protein S1                   | b0911     | 1.541E+08            |
| P0A7X3    | 30S ribosomal protein S9                   | b3230     | 1.486E+08            |
| P0A7J7    | 50S ribosomal protein L11                  | b3983     | 1.434E+08            |
| P0A7K2    | 50S ribosomal protein L7/L12               | b3986     | 1.422E+08            |

364

365 **Table 2:** The 20 most highly abundant proteins in *P. aeruginosa* during growth in Nutrient

366 Broth

| Accession | Description                 | Gene Name | Mean Abundance (n=3) |
|-----------|-----------------------------|-----------|----------------------|
| P09591    | Elongation factor Tu        | PA4265    | 1.215E+09            |
| P30718    | 60 kDa chaperonin           | PA4385    | 8.267E+08            |
| Q9HWP9    | Uncharacterized protein     | PA4132    | 5.857E+08            |
| Q9I2V5    | Aconitate hydratase B       | PA1787    | 4.160E+08            |
| P13794    | Outer membrane porin F      | PA1777    | 3.949E+08            |
| P05384    | DNA-binding protein HU-beta | PA1804    | 3.624E+08            |
| Q9HVC4    | 50S ribosomal protein L25   | PA4671    | 3.562E+08            |
| Q9HWC6    | 50S ribosomal protein L1    | PA4273    | 3.536E+08            |
| Q9HWE1    | 30S ribosomal protein S3    | PA4257    | 3.471E+08            |
| Q9HWE7    | 50S ribosomal protein L5    | PA4251    | 3.181E+08            |
| Q9HZ71    | 30S ribosomal protein S1    | PA3162    | 3.074E+08            |
| Q9HWD5    | 50S ribosomal protein L3    | PA4263    | 3.037E+08            |
| Q9HWD1    | 30S ribosomal protein S7    | PA4267    | 3.020E+08            |
| Q9HWD6    | 50S ribosomal protein L4    | PA4262    | 2.792E+08            |
| Q9HWD8    | 50S ribosomal protein L2    | PA4260    | 2.691E+08            |
| Q9HWF0    | 50S ribosomal protein L6    | PA4248    | 2.658E+08            |
| Q9HWC7    | 50S ribosomal protein L10   | PA4272    | 2.490E+08            |
| Q9HVL6    | 50S ribosomal protein L21   | PA4568    | 2.433E+08            |
| O82851    | Elongation factor Ts        | PA3655    | 2.337E+08            |
| O52759    | 30S ribosomal protein S4    | PA4239    | 2.276E+08            |

367

368 **Table 3:** The 20 most highly abundant proteins in *A. baumannii* during growth in Nutrient

369 Broth

| Accession | Description                                    | Gene Name  | Mean Abundance (n=3) |
|-----------|------------------------------------------------|------------|----------------------|
| B7I876    | Outer membrane protein A                       | AB57_3344  | 2.562E+08            |
| B7I359    | 50S ribosomal protein L7/L12                   | AB57_0368  | 1.138E+08            |
| B2HZ92    | 50S ribosomal protein L18                      | AB57_3514  | 9.635E+07            |
| B0VSP5    | 60 kDa chaperonin                              | AB57_06545 | 9.230E+07            |
| B7IB16    | Peroxiredoxin                                  | AB57_1341  | 8.615E+07            |
| B7GW08    | 30S ribosomal protein S3                       | AB57_3524  | 8.434E+07            |
| B7IA20    | 50S ribosomal protein L15                      | AB57_3511  | 8.280E+07            |
| B7I3K0    | Elongation factor Ts                           | AB57_2755  | 8.274E+07            |
| B7H1K1    | 50S ribosomal protein L1                       | AB57_0366  | 7.769E+07            |
| B7I6T2    | Succinyl-CoA ligase [ADP-forming] subunit beta | AB57_3123  | 7.753E+07            |
| B7IBC1    | 30S ribosomal protein S6                       | AB57_2509  | 7.533E+07            |
| B7I1W2    | ATP synthase subunit alpha                     | AB57_0191  | 7.474E+07            |
| B7IBK5    | Chaperone protein DnaK                         | AB57_0048  | 6.976E+07            |
| B7IA15    | 30S ribosomal protein S4                       | AB57_3506  | 6.646E+07            |
| B7I1W4    | ATP synthase subunit beta                      | AB57_0193  | 6.254E+07            |
| B7I358    | 50S ribosomal protein L10                      | AB57_0367  | 6.189E+07            |
| B0VQT3    | 50S ribosomal protein L6                       | AB57_3515  | 6.138E+07            |
| B7IAS9    | 50S ribosomal protein L19                      | AB57_3615  | 6.042E+07            |
| B7IA27    | 50S ribosomal protein L5                       | AB57_3518  | 5.886E+07            |
| B7GYM8    | Elongation factor G                            | AB57_06485 | 5.795E+07            |

370

371 **Table 4:** Codon Usage Table for 20 Most Highly Expressed Genes in *E. coli*

|          |      |      |        |       |      |      |        |       |      |      |        |       |      |      |        |
|----------|------|------|--------|-------|------|------|--------|-------|------|------|--------|-------|------|------|--------|
| TTT F    | 0.18 | 5.7  | ( 28)  | TCT S | 0.43 | 18.8 | ( 93)  | TAT Y | 0.19 | 5.0  | ( 25)  | TGT C | 0.37 | 1.4  | ( 7)   |
| TTC F    | 0.82 | 25.8 | ( 128) | TCC S | 0.35 | 15.1 | ( 75)  | TAC Y | 0.81 | 21.4 | ( 106) | TGC C | 0.63 | 2.4  | ( 12)  |
| TTA L    | 0.03 | 1.8  | ( 9)   | TCA S | 0.02 | 0.8  | ( 4)   | TAA * | 0.95 | 3.8  | ( 19)  | TGA * | 0.05 | 0.2  | ( 1)   |
| TTG L(s) | 0.03 | 1.8  | ( 9)   | TCG S | 0.00 | 0.2  | ( 1)   | TAG * | 0.00 | 0.0  | ( 0)   | TGG W | 1.00 | 6.7  | ( 33)  |
| CTT L    | 0.03 | 2.2  | ( 11)  | CCT P | 0.09 | 3.0  | ( 15)  | CAT H | 0.26 | 3.8  | ( 19)  | CGT R | 0.71 | 40.5 | ( 201) |
| CTC L    | 0.03 | 2.4  | ( 12)  | CCC P | 0.01 | 0.4  | ( 2)   | CAC H | 0.74 | 10.7 | ( 53)  | CGC R | 0.28 | 16.1 | ( 80)  |
| CTA L    | 0.00 | 0.0  | ( 0)   | CCA P | 0.14 | 4.6  | ( 23)  | CAA Q | 0.12 | 4.0  | ( 20)  | CGA R | 0.00 | 0.0  | ( 0)   |
| CTG L(s) | 0.88 | 63.3 | ( 314) | CCG P | 0.76 | 25.6 | ( 127) | CAG Q | 0.88 | 30.1 | ( 149) | CGG R | 0.01 | 0.4  | ( 2)   |
| ATT I    | 0.17 | 8.9  | ( 44)  | ACT T | 0.46 | 26.0 | ( 129) | AAT N | 0.08 | 3.6  | ( 18)  | AGT S | 0.05 | 2.0  | ( 10)  |
| ATC I    | 0.83 | 44.4 | ( 220) | ACC T | 0.49 | 27.6 | ( 137) | AAC N | 0.92 | 39.1 | ( 194) | AGC S | 0.15 | 6.7  | ( 33)  |
| ATA I    | 0.00 | 0.0  | ( 0)   | ACA T | 0.04 | 2.0  | ( 10)  | AAA K | 0.80 | 59.1 | ( 293) | AGA R | 0.01 | 0.4  | ( 2)   |
| ATG M(s) | 1.00 | 24.0 | ( 119) | ACG T | 0.02 | 1.0  | ( 5)   | AAG K | 0.20 | 14.7 | ( 73)  | AGG R | 0.00 | 0.0  | ( 0)   |
| GTT V    | 0.57 | 55.1 | ( 273) | GCT A | 0.51 | 54.5 | ( 270) | GAT D | 0.28 | 16.5 | ( 82)  | GGT G | 0.59 | 53.2 | ( 264) |
| GTC V    | 0.06 | 5.8  | ( 29)  | GCC A | 0.07 | 7.5  | ( 37)  | GAC D | 0.72 | 42.0 | ( 208) | GGC G | 0.40 | 35.7 | ( 177) |
| GTA V    | 0.28 | 27.0 | ( 134) | GCA A | 0.25 | 27.0 | ( 134) | GAA E | 0.81 | 56.9 | ( 282) | GGA G | 0.00 | 0.4  | ( 2)   |
| GTG V    | 0.09 | 9.1  | ( 45)  | GCG A | 0.16 | 17.4 | ( 86)  | GAG E | 0.19 | 13.3 | ( 66)  | GGG G | 0.01 | 0.8  | ( 4)   |

372

373 Codon usage for a concatenated sequence representing the open reading frames of the  
 374 genes encoding the 20 most abundant proteins, as shown in Table 1.  
 375 Values shown: Codon, Amino Acid, codon usage (fraction of 1), usage per 1000 in total  
 376 sequence, (absolute usage in total sequence).

377 **Table 5: Codon Usage Table for 20 Most Highly Expressed Genes in *P. aeruginosa***

|          |      |      |        |       |      |      |        |       |      |      |        |       |      |      |        |
|----------|------|------|--------|-------|------|------|--------|-------|------|------|--------|-------|------|------|--------|
| TTT F    | 0.08 | 2.1  | ( 11)  | TCT S | 0.04 | 1.9  | ( 10)  | TAT Y | 0.07 | 1.4  | ( 7)   | TGT C | 0.03 | 0.2  | ( 1)   |
| TTC F    | 0.92 | 25.6 | ( 132) | TCC S | 0.48 | 23.3 | ( 120) | TAC Y | 0.93 | 18.8 | ( 97)  | TGC C | 0.97 | 5.2  | ( 27)  |
| TTA L    | 0.00 | 0.2  | ( 1)   | TCA S | 0.00 | 0.0  | ( 0)   | TAA * | 0.75 | 2.9  | ( 15)  | TGA * | 0.20 | 0.8  | ( 4)   |
| TTG L(s) | 0.01 | 1.2  | ( 6)   | TCG S | 0.16 | 7.8  | ( 40)  | TAG * | 0.05 | 0.2  | ( 1)   | TGG W | 1.00 | 5.0  | ( 26)  |
| CTT L    | 0.01 | 1.0  | ( 5)   | CCT P | 0.08 | 2.7  | ( 14)  | CAT H | 0.24 | 4.3  | ( 22)  | CGT R | 0.44 | 29.3 | ( 151) |
| CTC L    | 0.12 | 9.7  | ( 50)  | CCC P | 0.17 | 6.2  | ( 32)  | CAC H | 0.76 | 13.4 | ( 69)  | CGC R | 0.50 | 33.0 | ( 170) |
| CTA L    | 0.00 | 0.4  | ( 2)   | CCA P | 0.01 | 0.2  | ( 1)   | CAA Q | 0.15 | 5.2  | ( 27)  | CGA R | 0.01 | 0.6  | ( 3)   |
| CTG L(s) | 0.84 | 66.5 | ( 343) | CCG P | 0.75 | 27.0 | ( 139) | CAG Q | 0.85 | 29.3 | ( 151) | CGG R | 0.04 | 2.7  | ( 14)  |
| ATT I    | 0.09 | 4.8  | ( 25)  | ACT T | 0.12 | 5.2  | ( 27)  | AAT N | 0.08 | 2.5  | ( 13)  | AGT S | 0.02 | 1.2  | ( 6)   |
| ATC I    | 0.91 | 48.3 | ( 249) | ACC T | 0.85 | 37.1 | ( 191) | AAC N | 0.92 | 30.5 | ( 157) | AGC S | 0.30 | 14.4 | ( 74)  |
| ATA I    | 0.00 | 0.0  | ( 0)   | ACA T | 0.01 | 0.4  | ( 2)   | AAA K | 0.24 | 17.1 | ( 88)  | AGA R | 0.00 | 0.2  | ( 1)   |
| ATG M(s) | 1.00 | 23.3 | ( 120) | ACG T | 0.02 | 0.8  | ( 4)   | AAG K | 0.76 | 55.5 | ( 286) | AGG R | 0.00 | 0.2  | ( 1)   |
| GTT V    | 0.20 | 20.0 | ( 103) | GCT A | 0.27 | 29.5 | ( 152) | GAT D | 0.22 | 11.6 | ( 60)  | GGT G | 0.35 | 32.2 | ( 166) |
| GTC V    | 0.42 | 42.1 | ( 217) | GCC A | 0.51 | 55.7 | ( 287) | GAC D | 0.78 | 41.9 | ( 216) | GGC G | 0.62 | 56.7 | ( 292) |
| GTA V    | 0.12 | 12.0 | ( 62)  | GCA A | 0.08 | 8.3  | ( 43)  | GAA E | 0.57 | 43.1 | ( 222) | GGA G | 0.01 | 1.0  | ( 5)   |
| GTG V    | 0.27 | 26.8 | ( 138) | GCG A | 0.14 | 15.1 | ( 78)  | GAG E | 0.43 | 32.6 | ( 168) | GGG G | 0.02 | 1.9  | ( 10)  |

378

- 379 Codon usage for a concatenated sequence representing the open reading frames of the  
 380 genes encoding the 20 most abundant proteins, as shown in Table 2.  
 381 Values shown: Codon, Amino Acid, codon usage (fraction of 1), usage per 1000 in total  
 382 sequence, (absolute usage in total sequence).

383 **Table 6: Codon Usage Table for 20 Most Highly Expressed Genes in *A. baumannii***

|          |      |      |        |       |      |      |        |       |      |      |        |       |      |      |        |
|----------|------|------|--------|-------|------|------|--------|-------|------|------|--------|-------|------|------|--------|
| TTT F    | 0.31 | 8.9  | ( 53)  | TCT S | 0.56 | 24.5 | ( 146) | TAT Y | 0.46 | 10.9 | ( 65)  | TGT C | 0.80 | 3.4  | ( 20)  |
| TTC F    | 0.69 | 20.1 | ( 120) | TCC S | 0.01 | 0.5  | ( 3)   | TAC Y | 0.54 | 12.6 | ( 75)  | TGC C | 0.20 | 0.8  | ( 5)   |
| TTA L    | 0.37 | 28.5 | ( 170) | TCA S | 0.19 | 8.4  | ( 50)  | TAA * | 1.00 | 3.4  | ( 20)  | TGA * | 0.00 | 0.0  | ( 0)   |
| TTG L(s) | 0.19 | 14.9 | ( 89)  | TCG S | 0.05 | 2.2  | ( 13)  | TAG * | 0.00 | 0.0  | ( 0)   | TGG W | 1.00 | 3.7  | ( 22)  |
| CTT L    | 0.37 | 28.5 | ( 170) | CCT P | 0.35 | 11.9 | ( 71)  | CAT H | 0.16 | 1.7  | ( 10)  | CGT R | 0.88 | 46.5 | ( 277) |
| CTC L    | 0.02 | 1.3  | ( 8)   | CCC P | 0.00 | 0.0  | ( 0)   | CAC H | 0.84 | 8.9  | ( 53)  | CGC R | 0.11 | 5.7  | ( 34)  |
| CTA L    | 0.03 | 2.4  | ( 14)  | CCA P | 0.55 | 18.6 | ( 111) | CAA Q | 0.82 | 33.4 | ( 199) | CGA R | 0.00 | 0.0  | ( 0)   |
| CTG L(s) | 0.02 | 1.2  | ( 7)   | CCG P | 0.09 | 3.2  | ( 19)  | CAG Q | 0.18 | 7.2  | ( 43)  | CGG R | 0.00 | 0.2  | ( 1)   |
| ATT I    | 0.43 | 27.7 | ( 165) | ACT T | 0.64 | 34.7 | ( 207) | AAT N | 0.20 | 7.4  | ( 44)  | AGT S | 0.04 | 1.8  | ( 11)  |
| ATC I    | 0.57 | 37.2 | ( 222) | ACC T | 0.04 | 2.2  | ( 13)  | AAC N | 0.80 | 30.4 | ( 181) | AGC S | 0.15 | 6.4  | ( 38)  |
| ATA I    | 0.00 | 0.0  | ( 0)   | ACA T | 0.28 | 15.3 | ( 91)  | AAA K | 0.84 | 61.4 | ( 366) | AGA R | 0.01 | 0.3  | ( 2)   |
| ATG M(s) | 1.00 | 24.0 | ( 143) | ACG T | 0.03 | 1.7  | ( 10)  | AAG K | 0.16 | 11.9 | ( 71)  | AGG R | 0.00 | 0.0  | ( 0)   |
| GTT V    | 0.55 | 47.5 | ( 283) | GCT A | 0.54 | 63.9 | ( 381) | GAT D | 0.44 | 24.8 | ( 148) | GGT G | 0.80 | 69.1 | ( 412) |
| GTC V    | 0.03 | 2.9  | ( 17)  | GCC A | 0.02 | 1.8  | ( 11)  | GAC D | 0.56 | 31.4 | ( 187) | GGC G | 0.18 | 15.4 | ( 92)  |
| GTA V    | 0.35 | 30.2 | ( 180) | GCA A | 0.28 | 33.0 | ( 197) | GAA E | 0.84 | 65.7 | ( 392) | GGA G | 0.02 | 1.3  | ( 8)   |
| GTG V    | 0.07 | 5.7  | ( 34)  | GCG A | 0.16 | 18.8 | ( 112) | GAG E | 0.16 | 12.7 | ( 76)  | GGG G | 0.00 | 0.3  | ( 2)   |

384

385 Codon usage for a concatenated sequence representing the open reading frames of the  
 386 genes encoding the 20 most abundant proteins, as shown in Table 3.  
 387 Values shown: Codon, Amino Acid, codon usage (fraction of 1), usage per 1000 in total  
 388 sequence, (absolute usage in total sequence).

389 **Table 7:** Primers used for Site Directed Mutagenesis

| <b>Primer Name</b> | <b>Primer Sequence</b>                             | <b>Variant</b> |
|--------------------|----------------------------------------------------|----------------|
| a78g_F             | 5'-CGCAGCAGAGTCTTTGCCAGATTTAAAGATTGAAAAGCTTGAT-3'  | M1             |
| a153g_F            | 5'-GTGGGGCGTTGTTCTAAGCATGGTTTGGTGG-3'              | M2             |
| a216g_F            | 5'-GACACTCCATTTACGGCTAAGGATACTGAAAAGTTAGTCAC-3'    | M3             |
| a261g_a267g_F      | 5'-TGGTTTGTGGAGCGTGGCTATAAGATAAAGGGCAGCATTTC-3'    | M4,5           |
| a375g_a378g_F      | 5'-CAAATGAACTGCTTAAGAAGGACGGTAAGGTTCAAGCCAC-3'     | M6,7           |
| a435g_a441g_F      | 5'-GGCTAGTTAAGAATAAGATTGAAGTTTTTATCCAGGCCCG-3'     | M8,9           |
| a510g_F            | 5'-GGTTTGGTTGCCTGAAAGGAAGATATTATTTCGGTGGTTGTTTT-3' | M10            |
| a537g_F            | 5'-CGGTGGTTGTTTTATTAAGCCGTACGGTTTAGGCAATTTGG-3'    | M11            |
| a597g_F            | 5'-CTTGGCCAAAGTCCGCCAAGTTATTAAGTCCAAATATGG-3'      | M13            |
| a612g_F            | 5'-CGCCAAGTTATTAAGTCCAAGTATGGTAAGGCAAACTGGTT-3'    | M14            |
| a627g_F            | 5'-CCAAGTATGGTAAGGCAAAGCTGGTTGTTCCAAGTCA-3'        | M15            |
| a675g_F            | 5'-GACGCATCACTCTTGAAGCTTACATTAGAGCAGGC-3'          | M16            |
| a729g_F            | 5'-GTAAACGAAAGTAAAAAACCATCAAAGCCAAGCAACTAAATTC-3'  | M17 (KV)       |

390



391 **Figure Legends**

392 **Figure 1: Impact of codon usage “optimisation” on IMP-1 enzyme activity in *E. coli*.**

393 IMP-1 enzyme activity was measured using imipenem as substrate in whole cell extracts of  
394 *E. coli* MG1655 carrying empty vector pRW50, or this vector with the wild-type (pHIMP) or  
395 codon-optimised (pHEcIMP) *bla*<sub>IMP-1</sub> gene, each expressed from a hybrid strength integron  
396 promoter; or carrying a natural IMP-1 encoding plasmid originally from *P. aeruginosa*, which  
397 is the source of the cloned *bla*<sub>IMP-1</sub> and upstream/promoter sequence (pNIMP). Data are  
398 means +/- Standard Deviation, *n*=4.

399 **Figure 2. Impact of AAA to AAG lysine codon conversion on IMP-1 protein production.**

400 IMP-1 protein abundance in clinical isolates of *P. aeruginosa*, *A. baumannii* and *E. coli*  
401 carrying the cloned wild-type *bla*<sub>IMP-1</sub> gene (WT) and a variant having 17 AAA to AAG  
402 mutations (MUT). Protein abundance was measured in sonicated cell extracts and  
403 normalised using the abundance of the dominant selectable marker protein for the cloning  
404 vector carrying *bla*<sub>IMP-1</sub>. This was, for *E. coli*, where pSU18 was the cloning vector, Cat  
405 (chloramphenicol acetyl transferase) and for *P. aeruginosa* and *A. baumannii*, where pUBYT  
406 was the cloning vector, AphA (aminoglycoside [Kanamycin] phosphotransferase). Data are  
407 means +/- Standard Error of the Mean, *n*=3.

408 **Figure 3. AAA to AAG lysine codon conversions in *bla*<sub>IMP-1</sub>**

409 The 17 AAA lysine codons converted to AAG are marked and sequentially numbered in the  
410 *bla*<sub>IMP-1</sub> coding sequence. In some cases, two adjacent mutations were made at using a  
411 single primer in the same mutagenesis step, and are labelled as such: M x,y where x and y  
412 represent the two sequential mutations.

413 **Figure 4. Impact of sequential AAA to AAG lysine codon conversion on IMP-1 production in**

414 ***E. coli***

415 IMP-1 enzyme activity was measured using imipenem as substrate in whole cell extracts of

416 *E. coli* MG1655 carrying *bla*<sub>IMP-1</sub> cloned using pSU18 with one to seventeen AAA to AAG

417 mutations; each mutagenesis step being shown in figure 3. Some steps involved two

418 adjacent mutations, e.g. M4,5. Data are means +/- Standard Deviation,  $n=4$ .

419

420 **Figure 1**

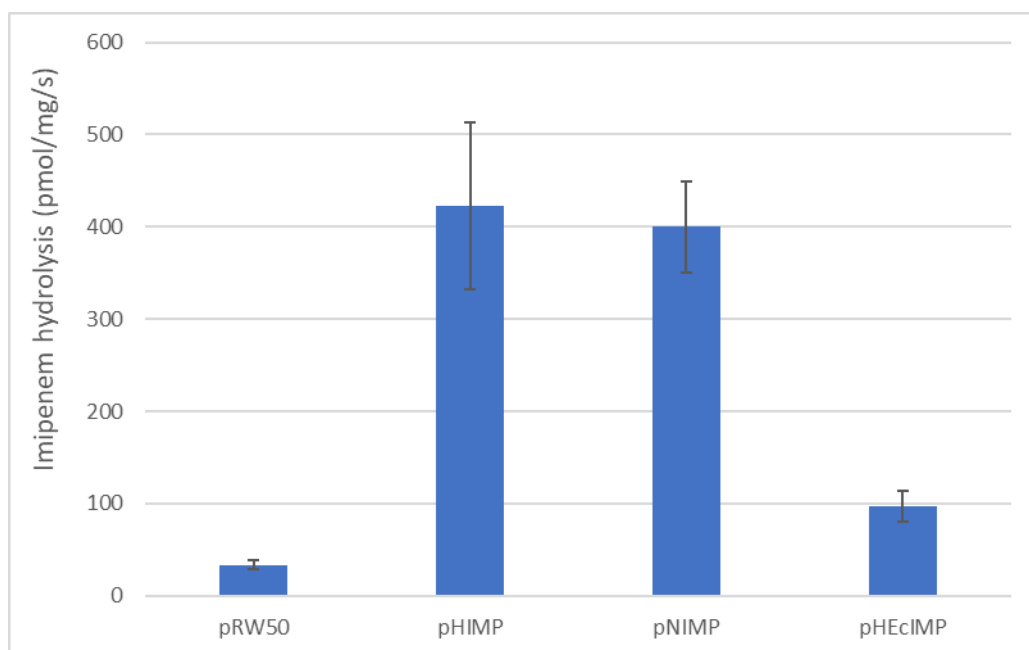

421

422 **Figure 2**

423 *P. aeruginosa*.

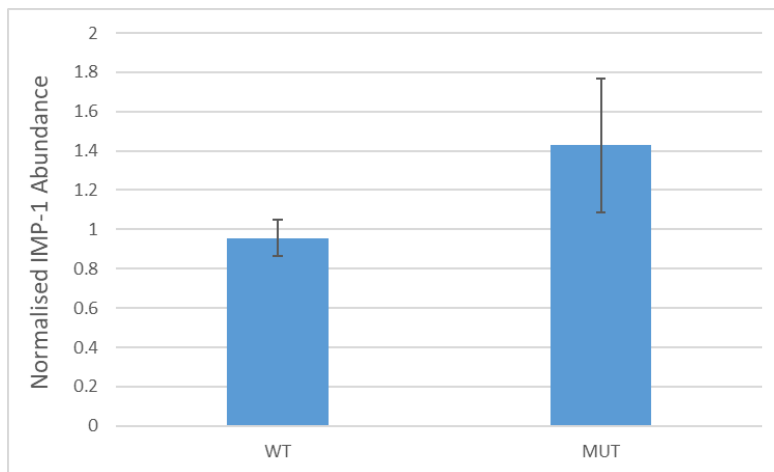

424

425 *A. baumannii*

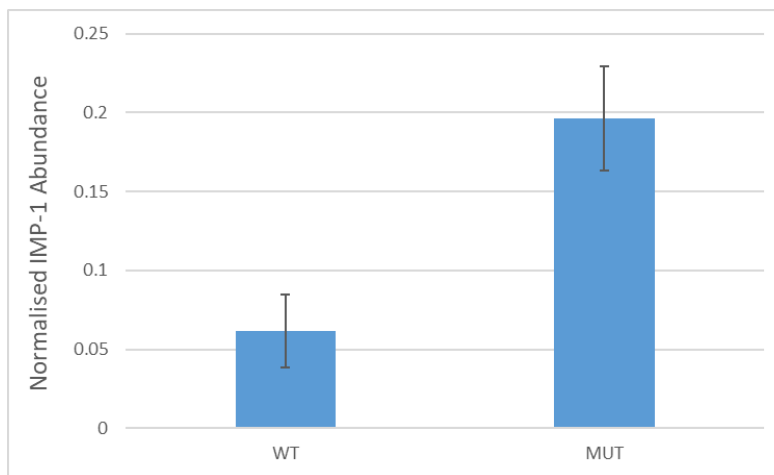

426

427 *E. coli*

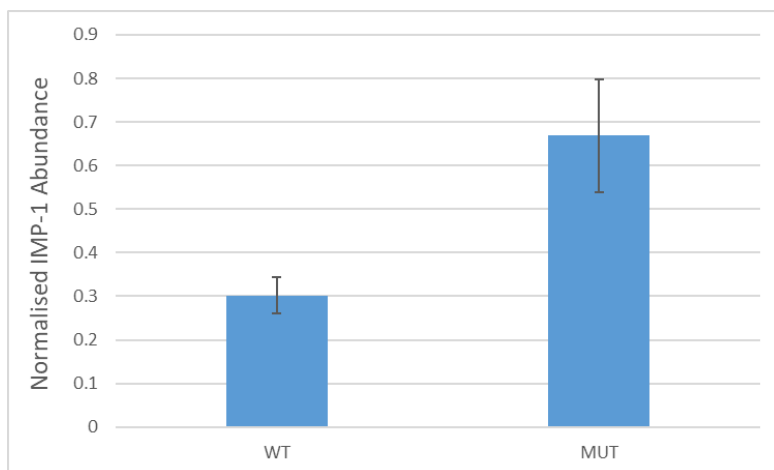

428



431 **Figure 4.**

432

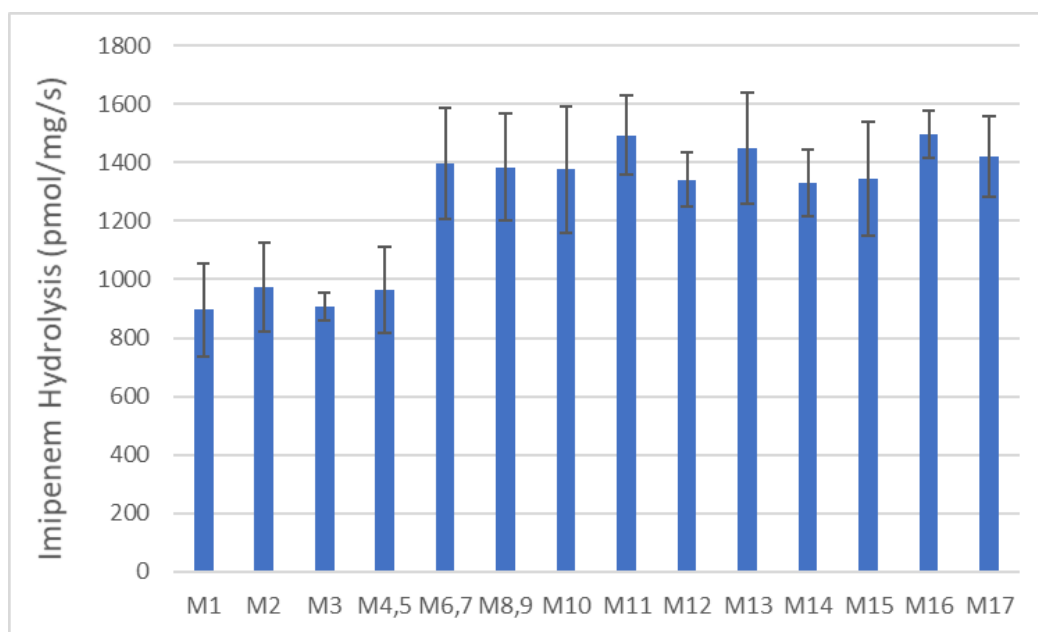

433
